# Supplementary material
Source: Research Square preprint supplement (doi:10.21203/rs.3.rs-8607469/v1)
Supplement: Supplementary file 1 [file f7015bf05a1b5576694c9141.docx]

**Raw Sugarcane Bagasse Hydrochar Outperforms Carbon Nanotubes in Microbial Fuel Cell Power Generation**

Abdul Azeez Olayiwola Sirajudeen 1,2,*, Kamil Kayode Katibi 3, Mohamad Suffian Mohamad Annuar 4*, Shaliza Ibrahim 1,5, Muhammad Aliyu 6, Temitope Theophilus Dele-Afolabi 7, Mohd Arif Dar 8,9, Siti Rohana Majid 8

1 *Institute of Sustainable Energy, Universiti Tenaga Nasional, 43000 Kajang, Selangor, Malaysia*

2 *Department of Biological Sciences, College of Natural and Applied Sciences, Crescent University, 110001 Abeokuta, Nigeria*

3 *Department of Physics, Faculty of Science, University Putra Malaysia, 43400 Serdang, Selangor, Malaysia*

4 *Institute of Biological Sciences, Faculty of Science, Universiti Malaya, 50603 Kuala Lumpur, Malaysia*

5 *Institute of Ocean and Earth Sciences, Universiti Malaya, 50603 Kuala Lumpur, Malaysia*

6 *Department of Chemical Technology, Faculty of Science, Chulalongkorn University, Bangkok 10330, Thailand*

7 *School of Mechanical Engineering, College of Engineering, Universiti Teknologi MARA, 40450 Shah Alam, Selangor, Malaysia*

8 *Centre for Ionics University Malaya, Department of Physics, Universiti Malaya, 50603 Kuala Lumpur, Malaysia*

9 *Faculty of Allied Health Sciences, Chettinad Hospital and Research Institute, Chettinad Academy of Research and Education, Kelambakkam 603103 Tamil Nadu, India*

*Corresponding Authors:

Dr. Abdul Azeez O. Sirajudeen Professor Dr. M. Suffian M. Annuar

Institute of Sustainable Energy Institute of Biological Sciences

Universiti Tenaga Nasional Faculty of Science, Universiti Malaya

43000 Kajang, Selangor, Malaysia 50603 Kuala Lumpur, Malaysia

e-mail: sirajudeen@uniten.edu.my e-mail: suffian_annuar@um.edu.my

Tel: +60379677182

Fax: +60379674178


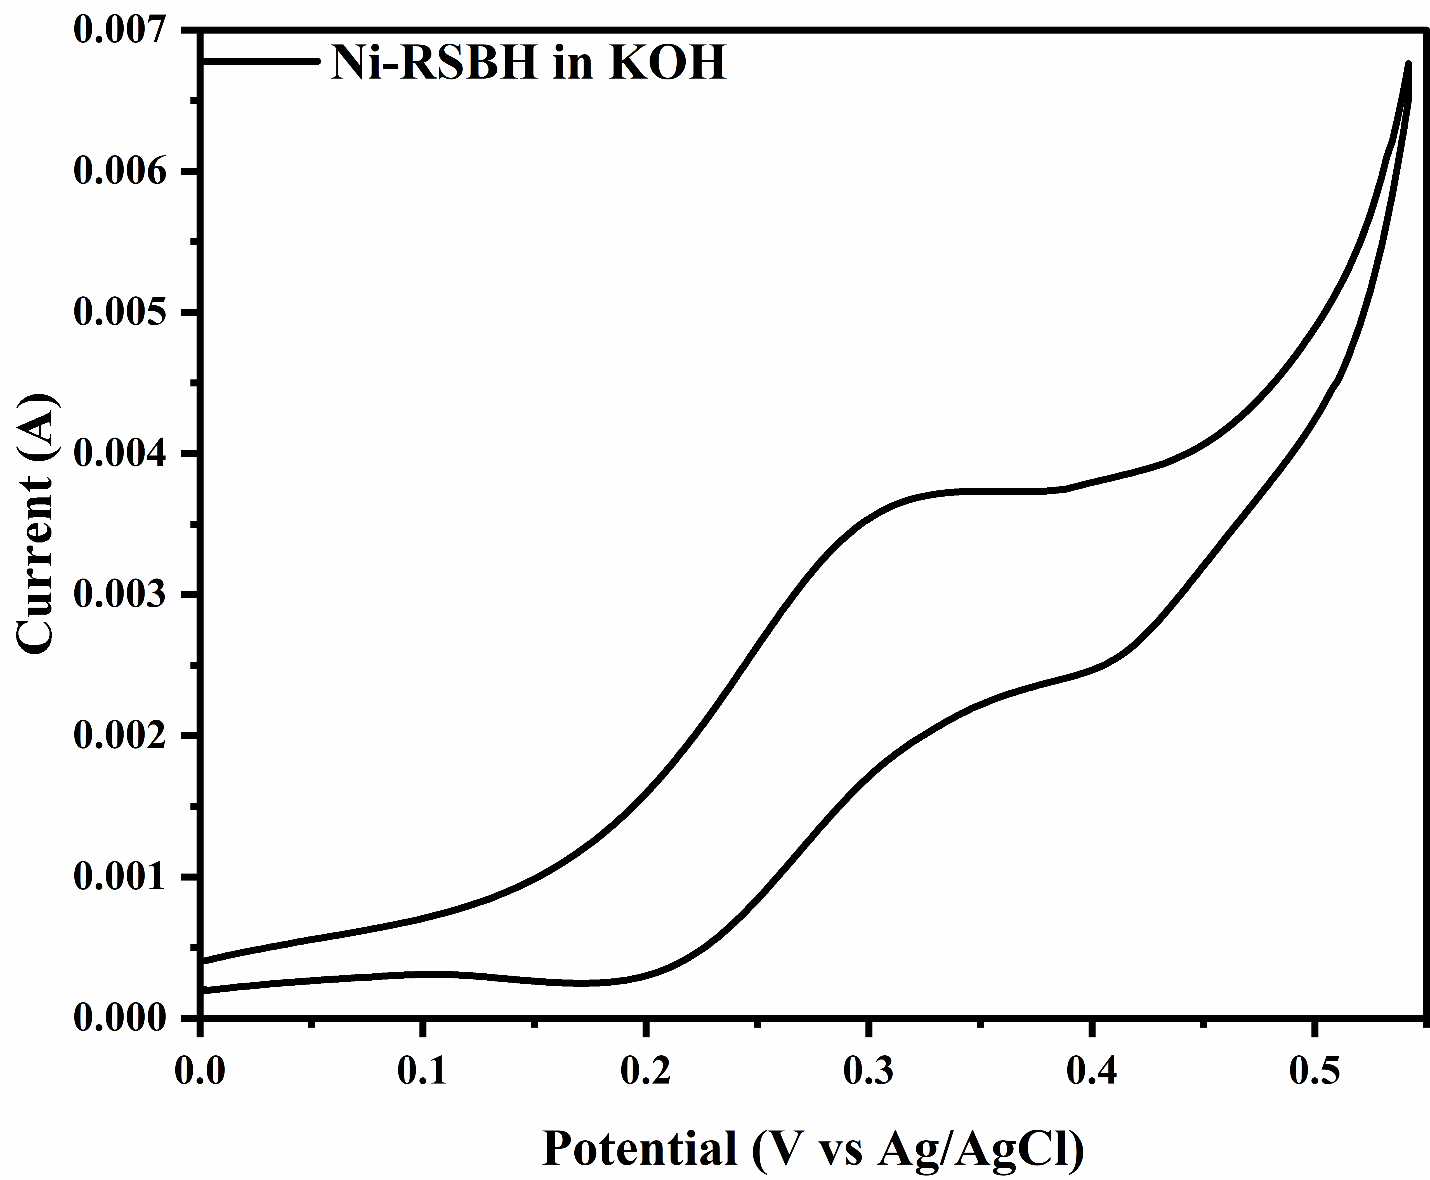


**Fig. *S*1** CV curve of Ni-RSBH cathode electrode in KOH prior to MFC application


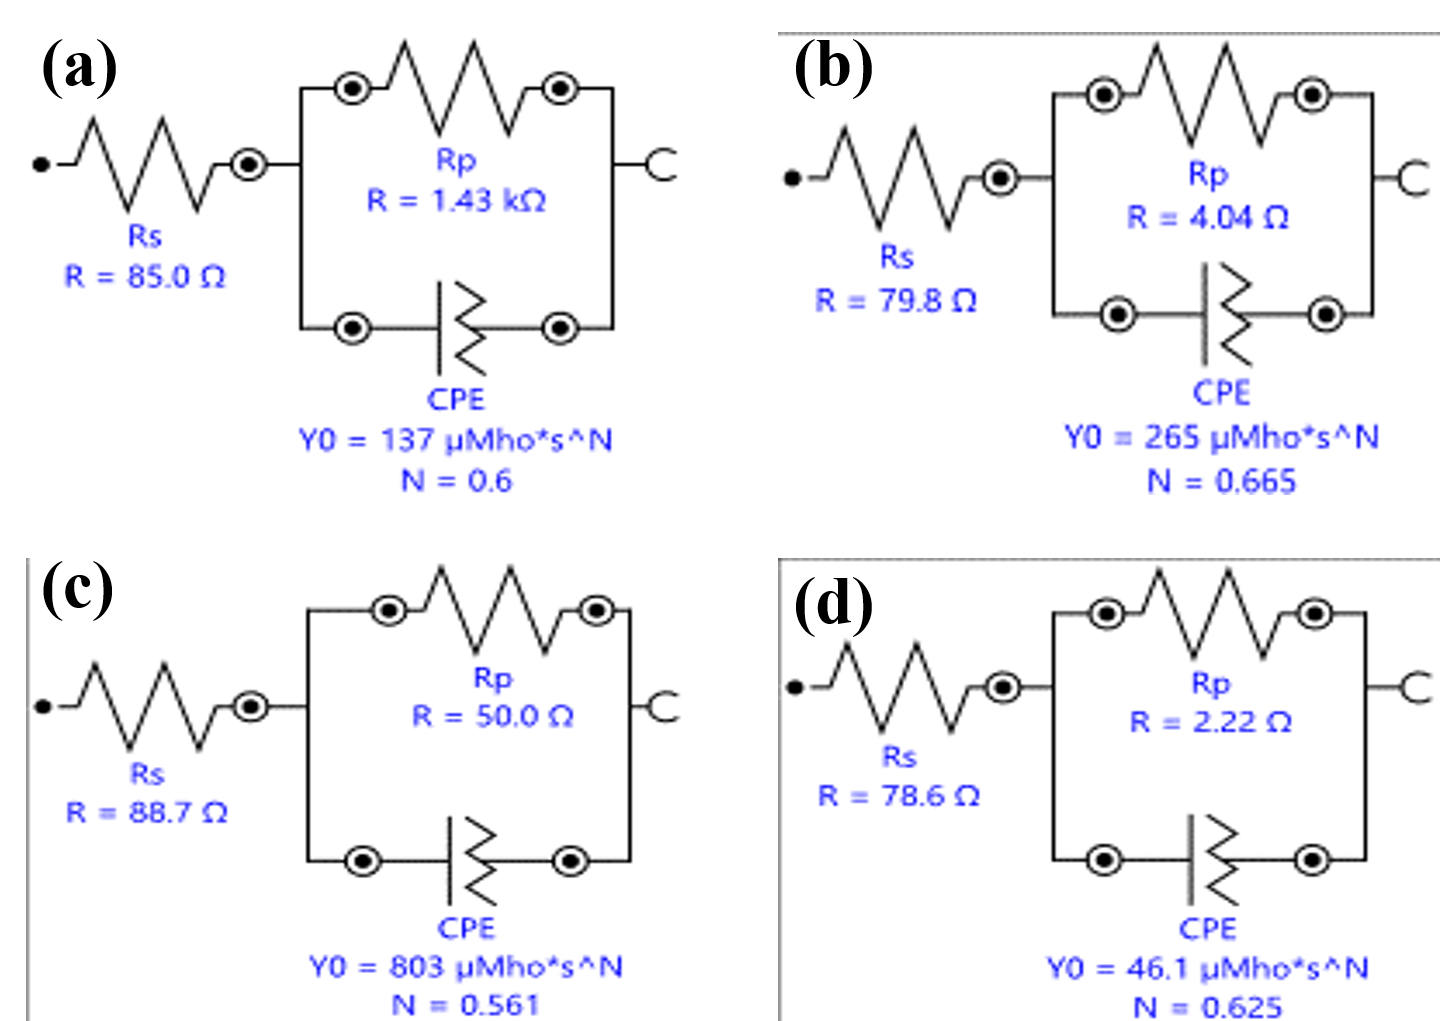


**Fig. *S*2** Anode electrode electrochemical circle fit from Nyquist plot of (a) Ni-RSBH, (b) Ni-PSBH, (c) Ni-SSBH and (d) Ni-CNT


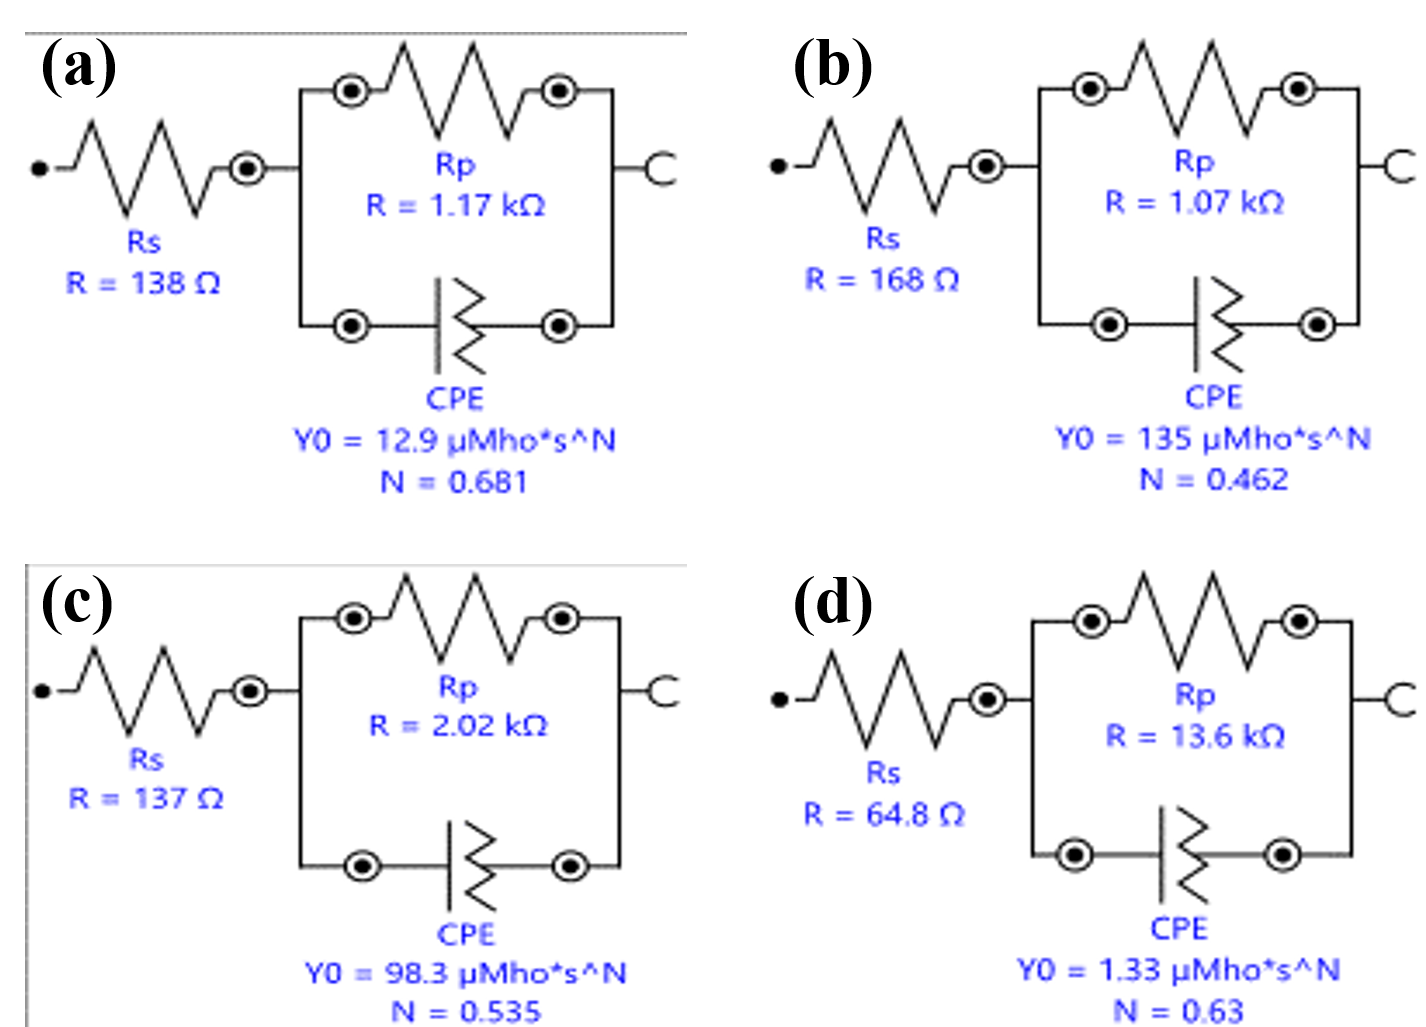


**Fig. *S*3** Cathode electrode electrochemical circle fit from Nyquist plot of (a) Ni-RSBH, (b) Ni-PSBH, (c) Ni-SSBH and (d) Ni-CNT
